# Supplementary material
Source: PubMed Central journal article supplement (PMC7511415)
Supplement: NIHMS1618744-supplement-1.pdf [file NIHMS1618744-supplement-1.pdf]

**Supplementary Table 1. Data Collection and Refinement Statistics**

| <b>Data Collection Statistics</b>    | <b>H-2Db-NA(10)</b>               | <b>H-2Db-NA(11)</b>               |
|--------------------------------------|-----------------------------------|-----------------------------------|
| Temperature                          | 100K                              | 100K                              |
| Space group                          | P2 <sub>1</sub>                   | P2 <sub>1</sub>                   |
| Cell Dimensions (a,b,c)(Å)           | 68.72, 44.96, 71.77<br>β = 98.23° | 69.01, 44.75, 71.66<br>β = 98.45° |
| Resolution (Å)                       | 45.95 – 1.50 (1.53 – 1.50)        | 45.91 – 1.55 (1.58 – 1.55)        |
| Total number of observations         | 247455 (12308)                    | 228178 (11040)                    |
| Number of unique observations        | 69128 (3413)                      | 62822 (3067)                      |
| Multiplicity                         | 3.6 (3.6)                         | 3.6 (3.6)                         |
| Data completeness (%)                | 99.1 (99.4)                       | 99.5 (99.6)                       |
| I/σ <sub>I</sub>                     | 17.6 (2.0)                        | 12.7 (2.0)                        |
| R <sub>pim</sub> <sup>a</sup> (%)    | 2.8 (39.0)                        | 5.6 (43.9)                        |
| <b>Refinement Statistics</b>         |                                   |                                   |
| Non-hydrogen atoms                   | 3774                              | 3769                              |
| Protein                              | 3202                              | 3175                              |
| Water                                | 572                               | 594                               |
| R <sub>factor</sub> <sup>b</sup> (%) | 17.81 (26.52)                     | 18.30 (28.80)                     |
| R <sub>free</sub> <sup>b</sup> (%)   | 20.88 (30.02)                     | 21.25 (31.93)                     |
| Rms deviations from ideality         |                                   |                                   |
| Bond lengths (Å)                     | 0.013                             | 0.013                             |
| Bond angles (°)                      | 1.57                              | 1.58                              |
| Ramachandran plot (%)                |                                   |                                   |
| Favored                              | 99                                | 99                                |
| Allowed                              | 0.79                              | 1.3                               |
| Outliers                             | 0                                 | 0                                 |

$$^a R_{p.i.m} = \frac{\sum_{hkl} [1/(N-1)]^{1/2} \sum_i |I_{hkl,i} - \langle I_{hkl} \rangle|}{\sum_{hkl} \langle I_{hkl} \rangle}$$

$$^b R_{factor} = \frac{\sum_{hkl} ||F_o| - |F_c||}{\sum_{hkl} |F_o|} \text{ for all data except } \approx 5\% \text{ which were used for } R_{free} \text{ calculation}$$

## Supplemental Fig. 1

**A**

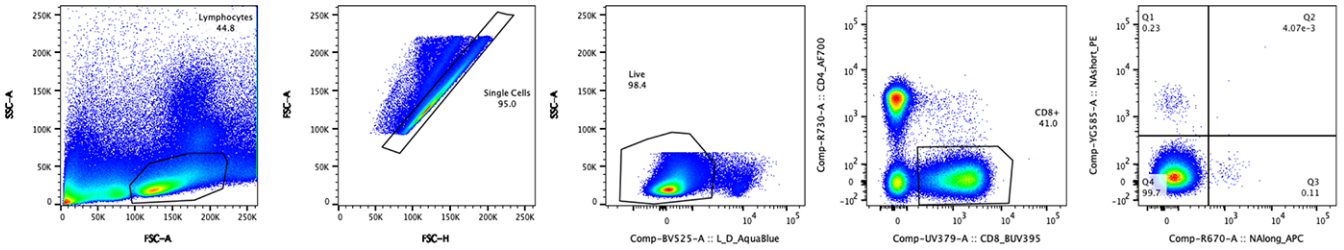

**B**

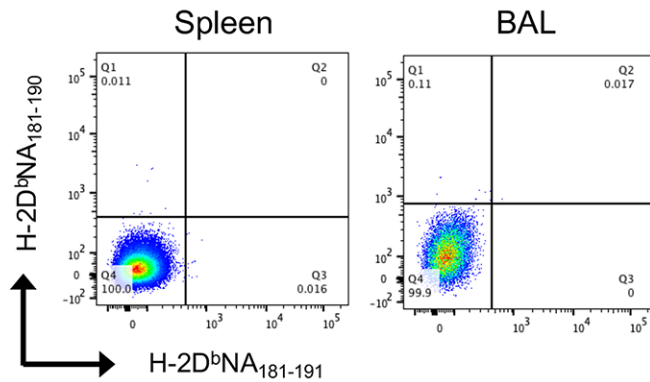

**C**

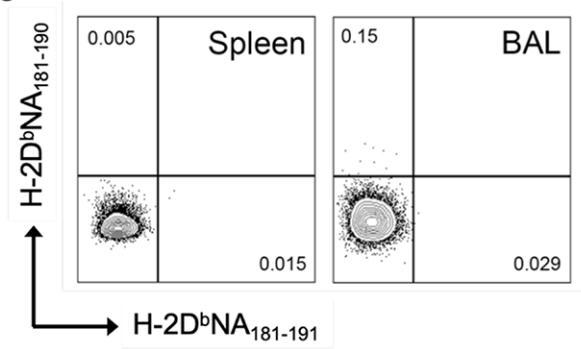

**D**

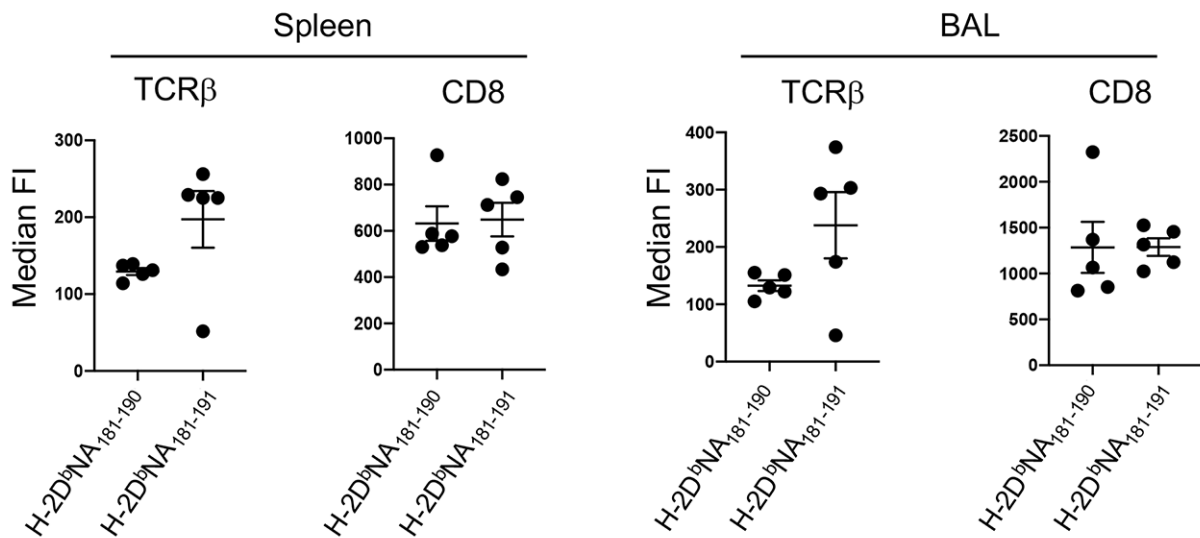

**Supplemental Fig. 1.** (A) Dot plots showing consecutive gating strategy for analysis of tetramer staining on splenic CD8<sup>+</sup> T cells. (B) Dot plots showing detection of tetramer staining in spleen and BAL samples stained with all antibodies but no tetramers (FMO control). (C) Tetramer staining on CD4<sup>+</sup> T cells from samples shown in Figure 1A. (D) Median fluorescence intensity of TCR $\beta$  and CD8 staining on spleen and BAL samples from tetramer dissociation experiment shown in Figure 2E.
